# Supplementary figures and images for: Variable opportunities for outcrossing result in hotspots of novel genetic variation in a pathogen metapopulation
Source: eLife journal article supplement (doi:10.7554/elife.47091), 2019-06-18

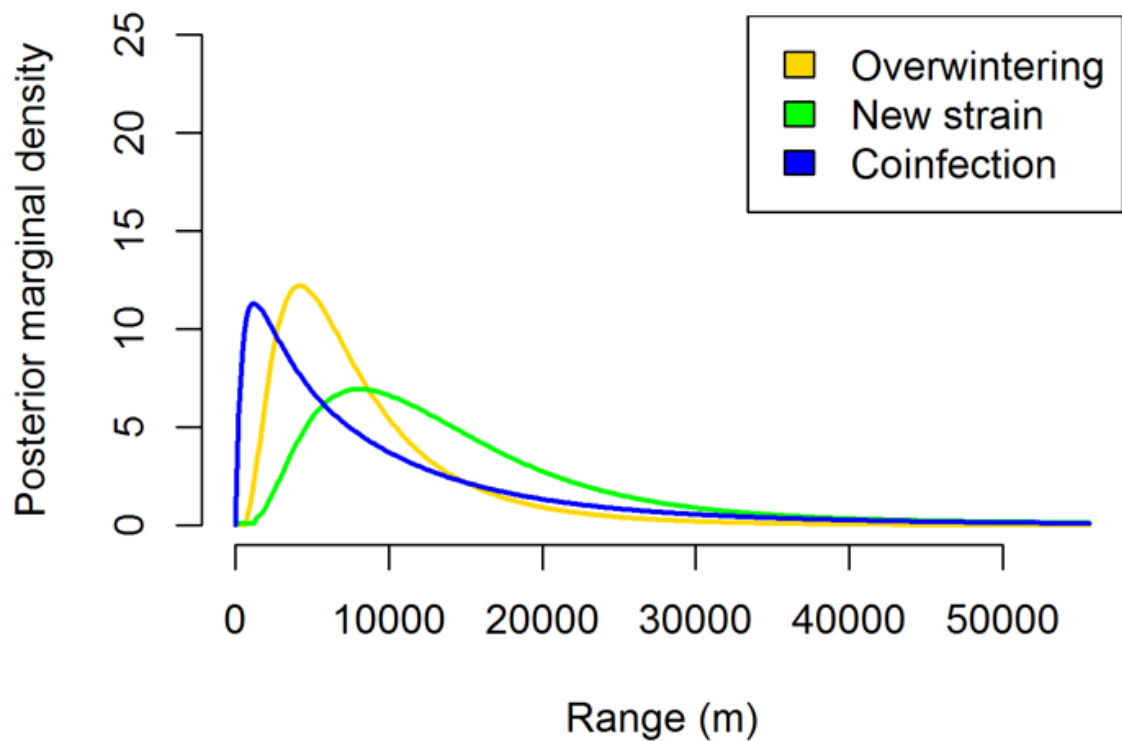

Supplement: supp [file elife-47091-supp-v1.zip]

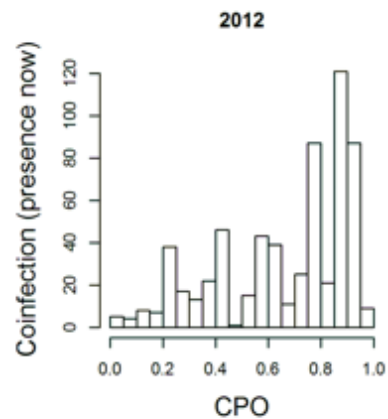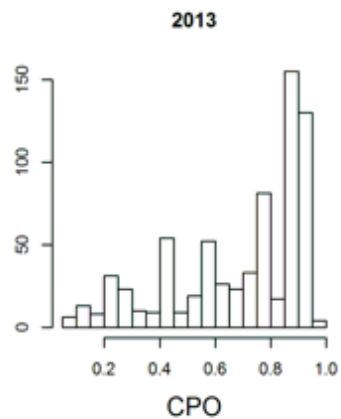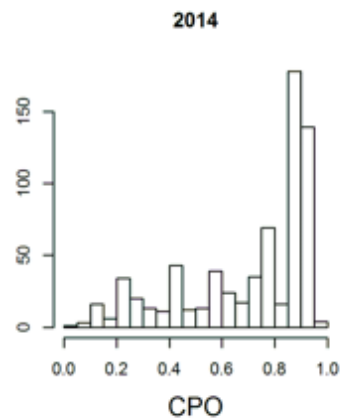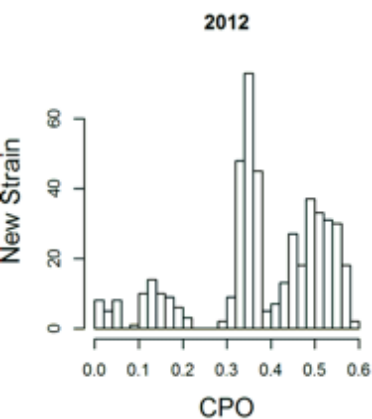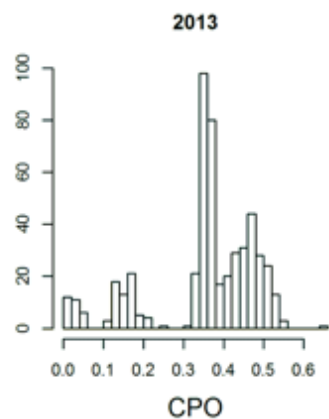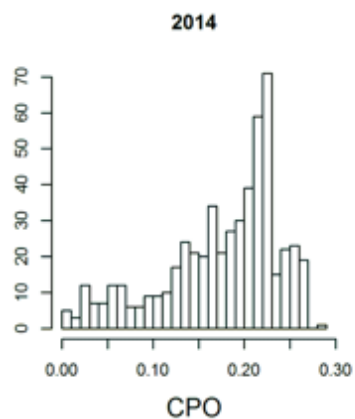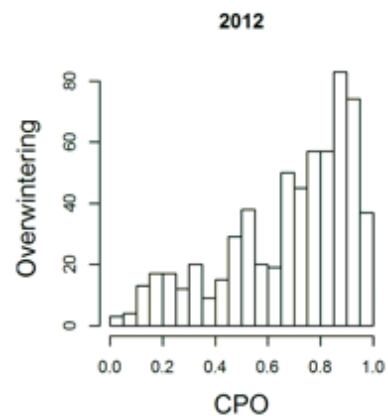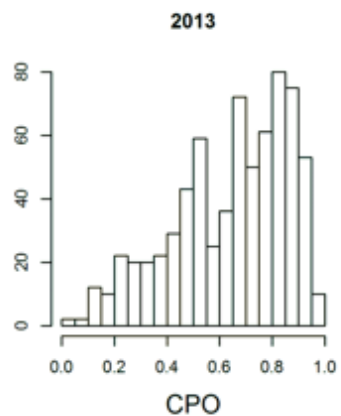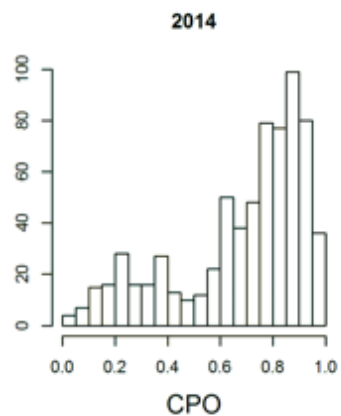

Supplement: supp [file elife-47091-supp-v1.zip]

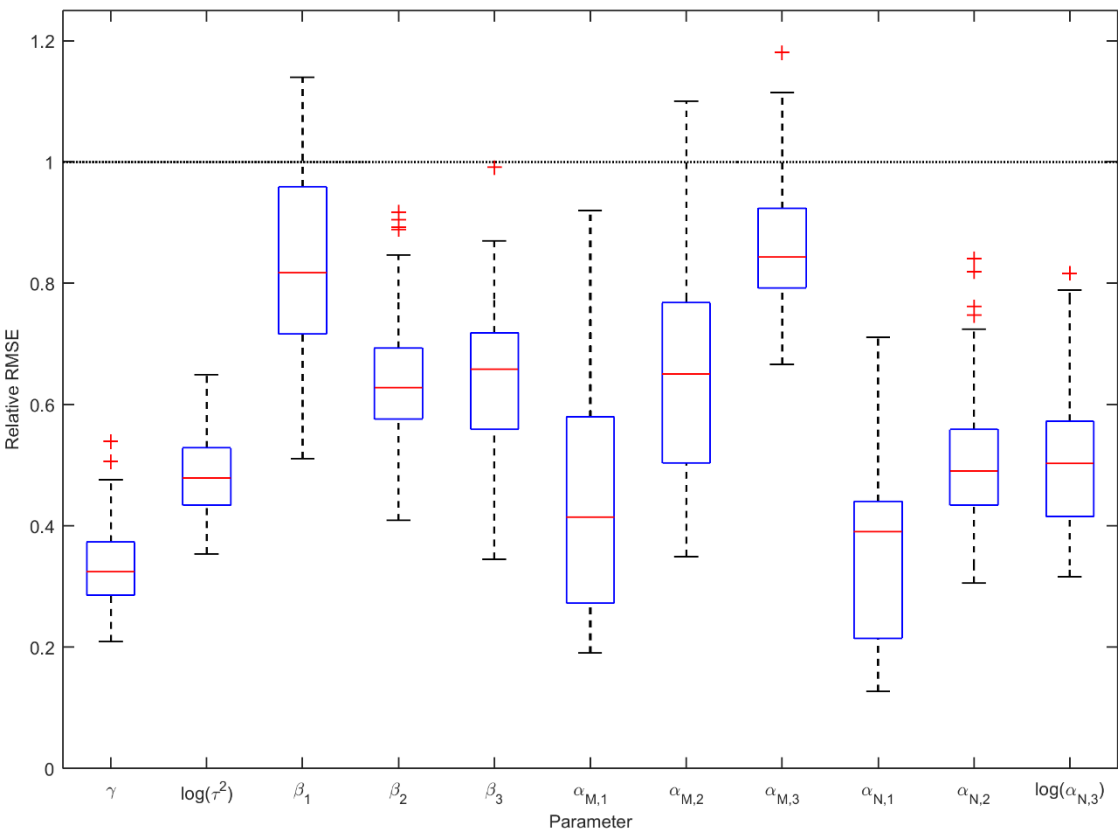

Supplement: supp [file elife-47091-supp-v1.zip]

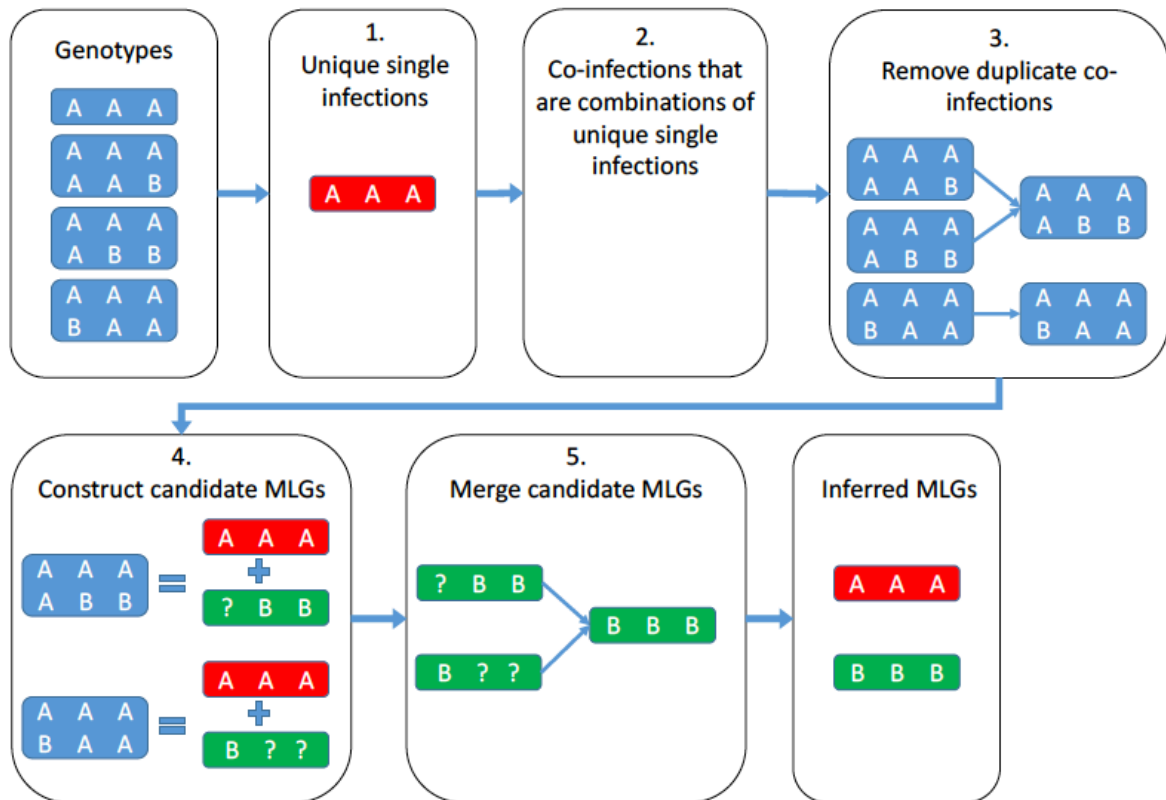

Supplement: supp [file elife-47091-supp-v1.zip]

**A****Coinfection (presence now)**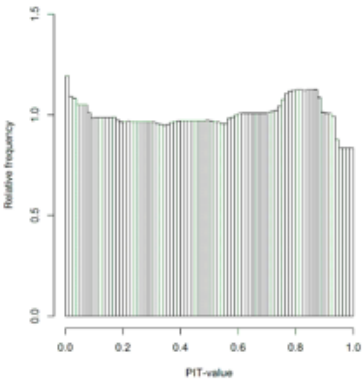**B****New Strains**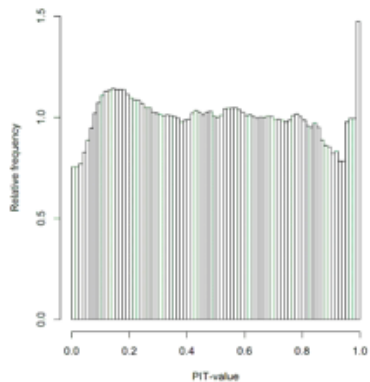**C****Overwintering**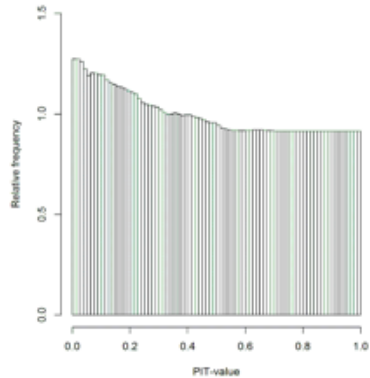

Supplement: supp [file elife-47091-supp-v1.zip]

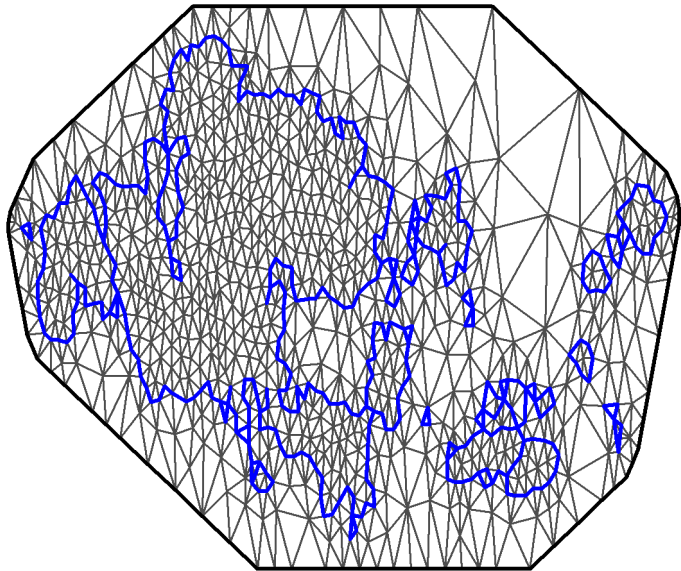

Supplement: supp [file elife-47091-supp-v1.zip]

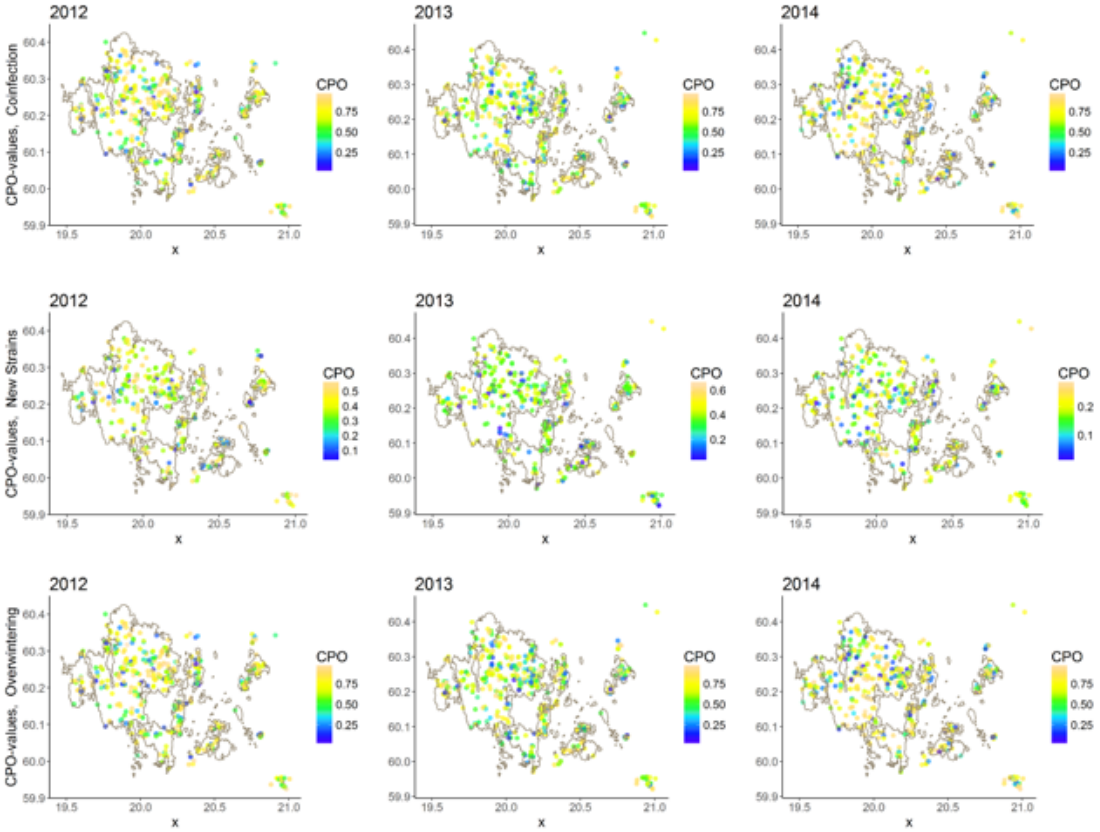

Supplement: supp [file elife-47091-supp-v1.zip]

Probability density

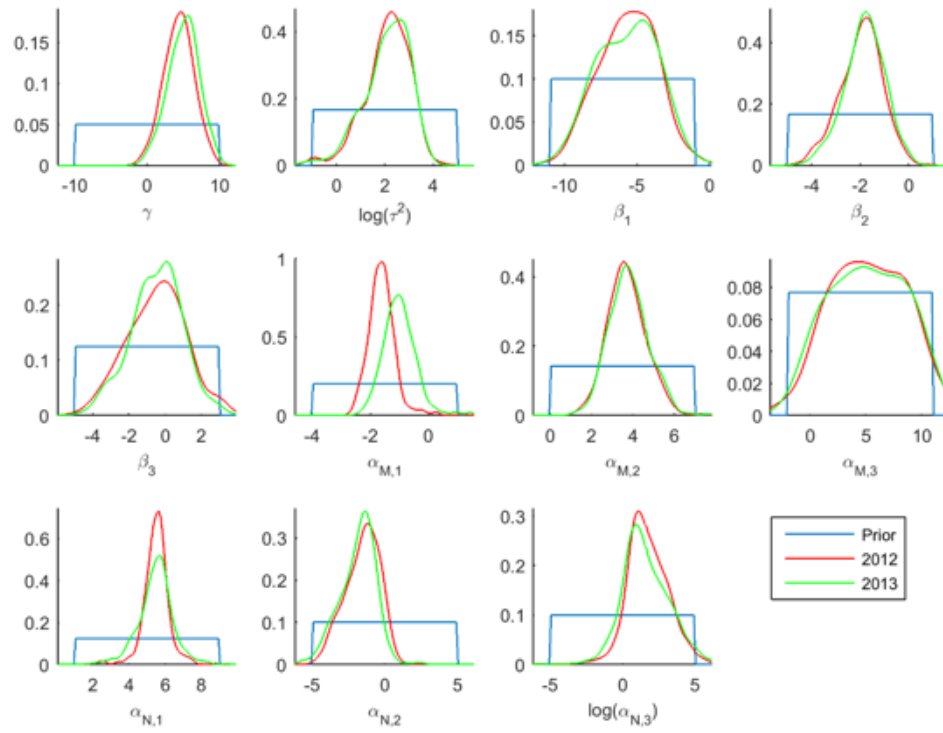

Supplement: supp [file elife-47091-supp-v1.zip]

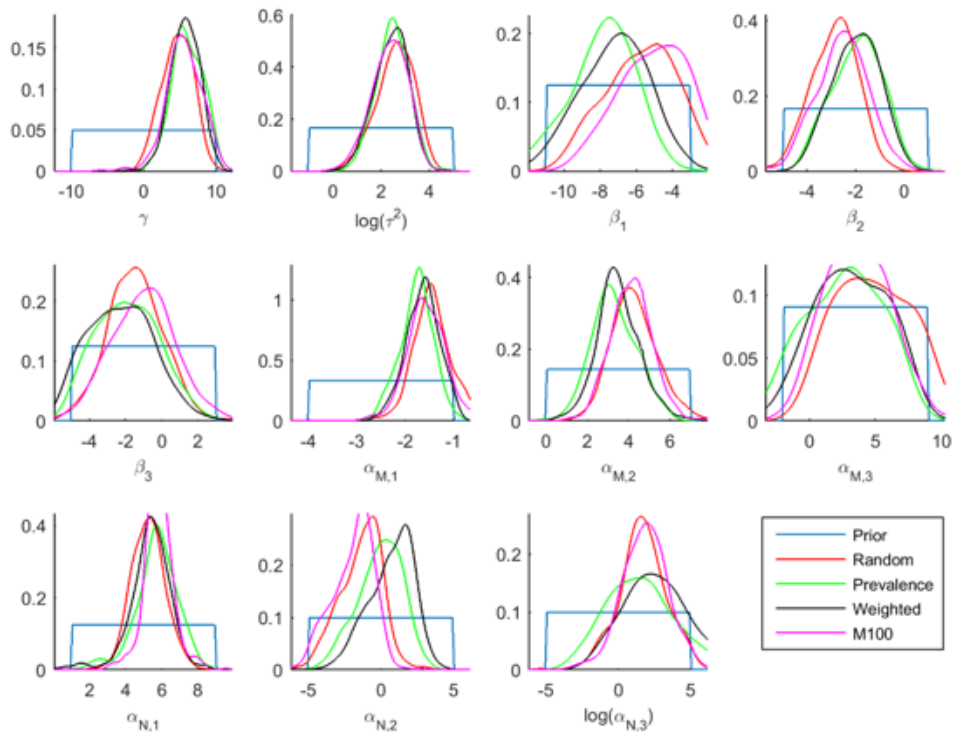

Supplement: supp [file elife-47091-supp-v1.zip]

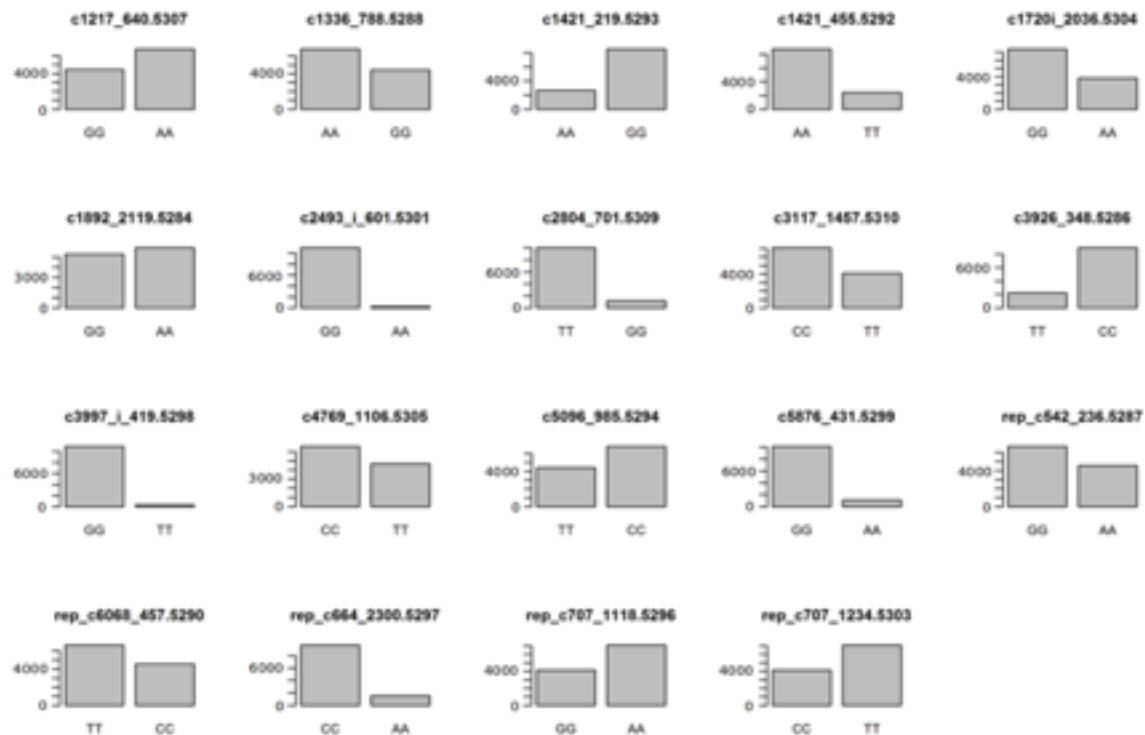

Supplement: supp [file elife-47091-supp-v1.zip]

**Abundance= 1**  
**mean= 2.59**

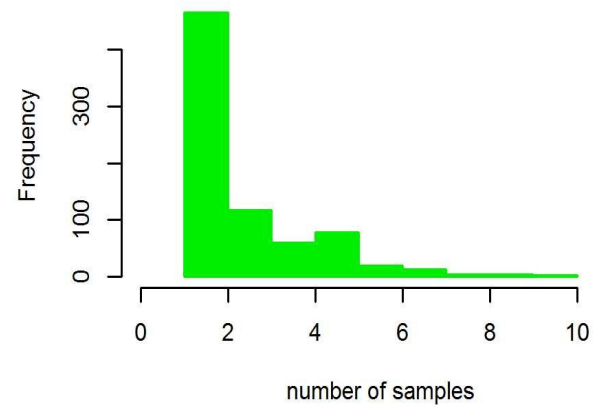

**Abundance= 2**  
**mean= 5.66**

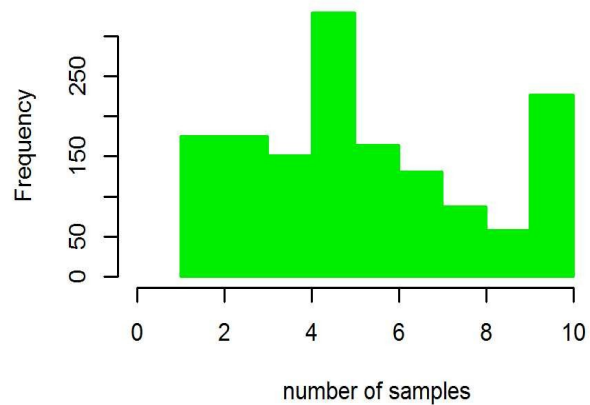

**Abundance= 3 +**  
**mean= 7.96**

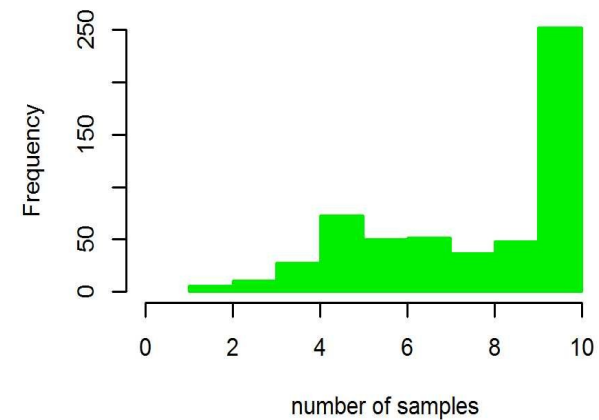

Supplement: supp [file elife-47091-supp-v1.zip]
